# Supplementary material
Source: PubMed Central journal article supplement (PMC4044709)

A

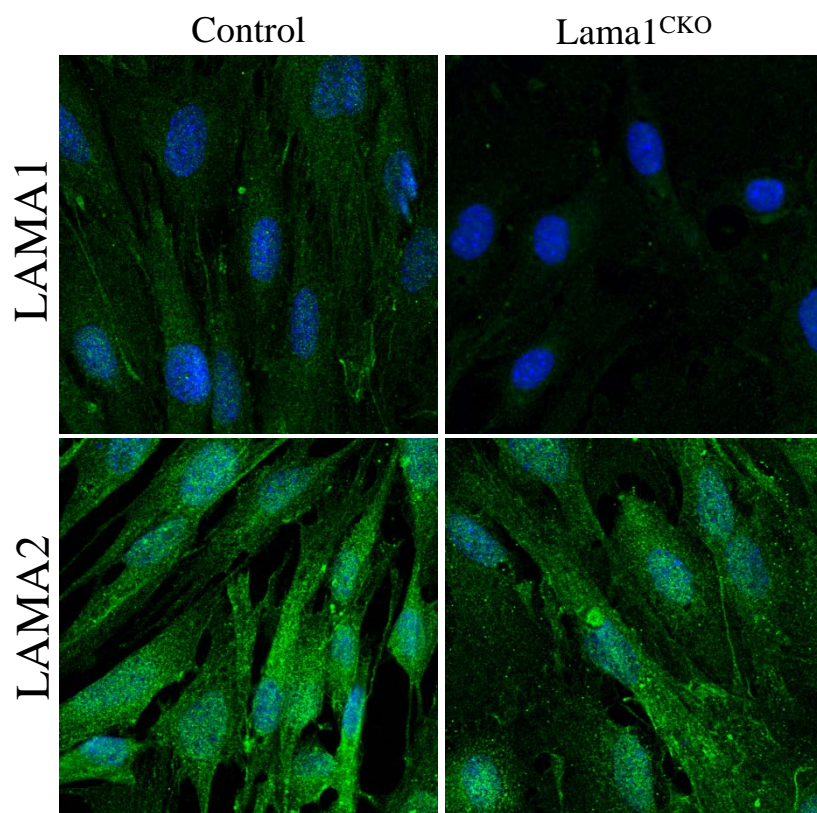

B

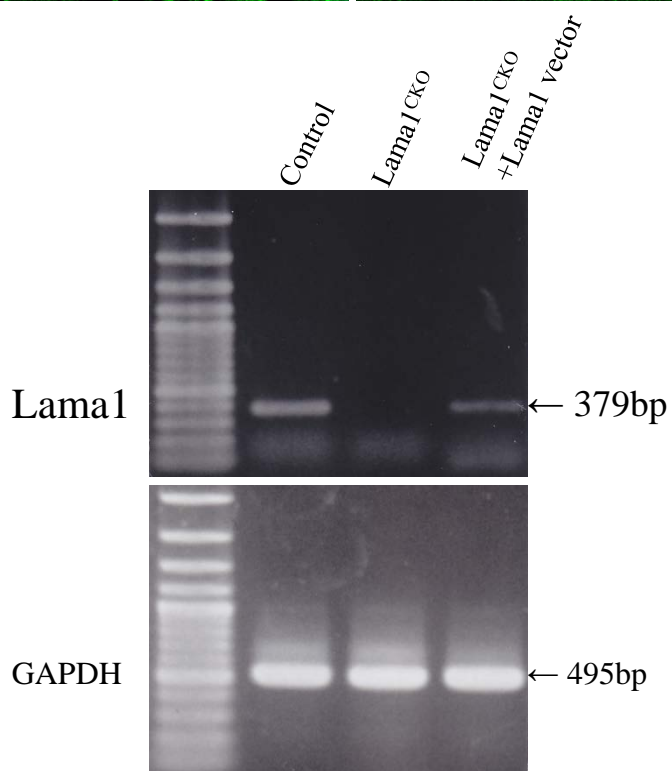

Figure 1. L. Ning et al.

Supplement: mmc1.pdf [file mmc1.pdf]

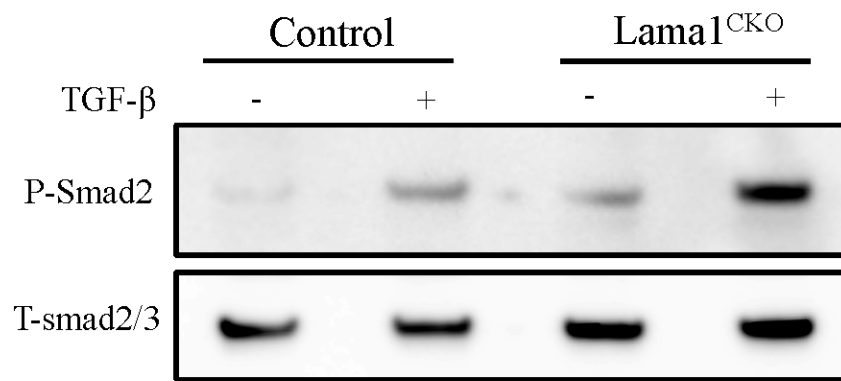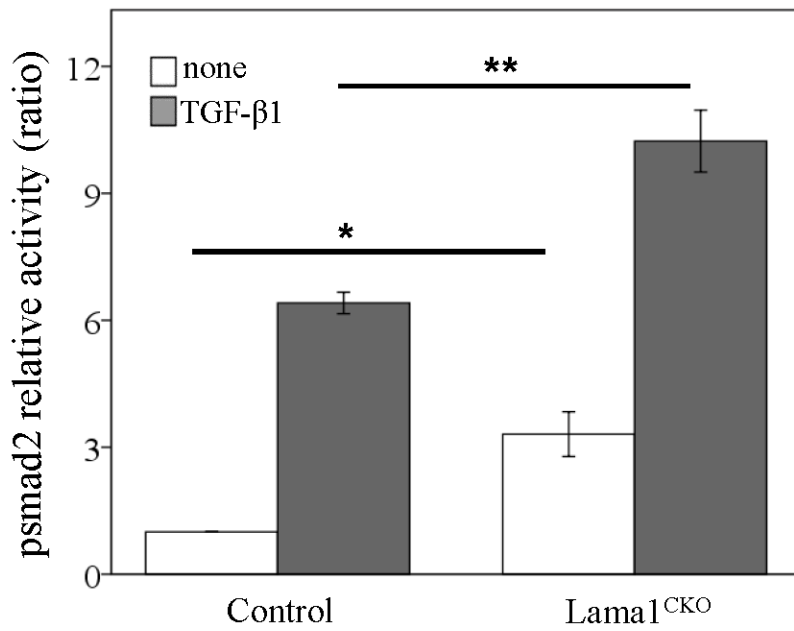

Supplement: mmc2.pdf [file mmc2.pdf]

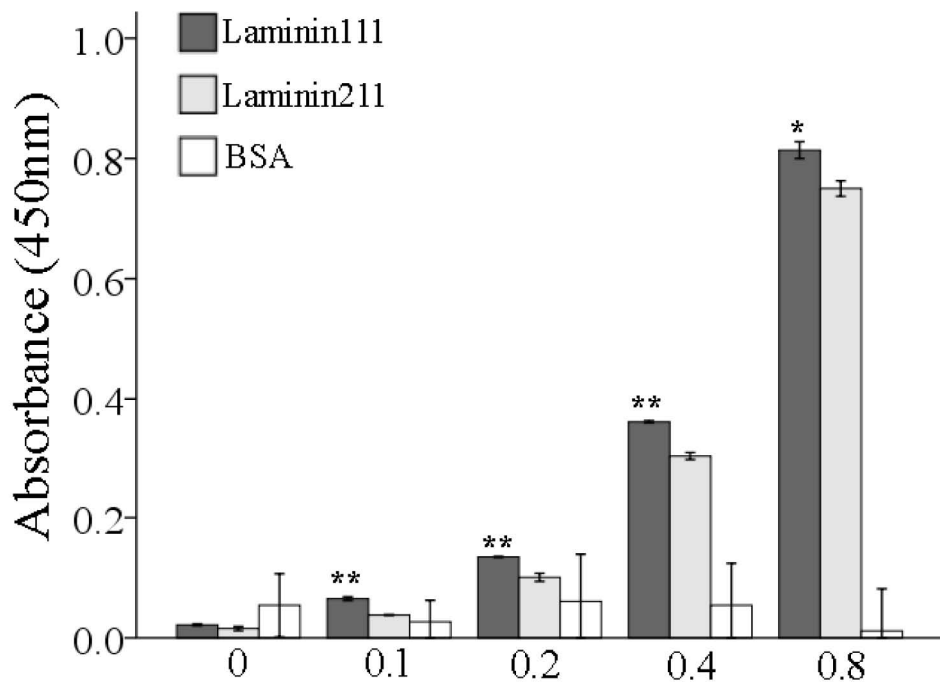

Supplement: mmc3.pdf [file mmc3.pdf]
